# Supplementary material for: Saturated Fatty Acids Promote GDF15 Expression in Human Macrophages through the PERK/eIF2/CHOP Signaling Pathway
Source: PubMed Central journal article supplement (PMC7764024; doi:10.3390/nu12123771), 2020-12-08
Supplement: nutrients-12-03771-s001.pdf [file nutrients-12-03771-s001.pdf]

Supplementary Materials

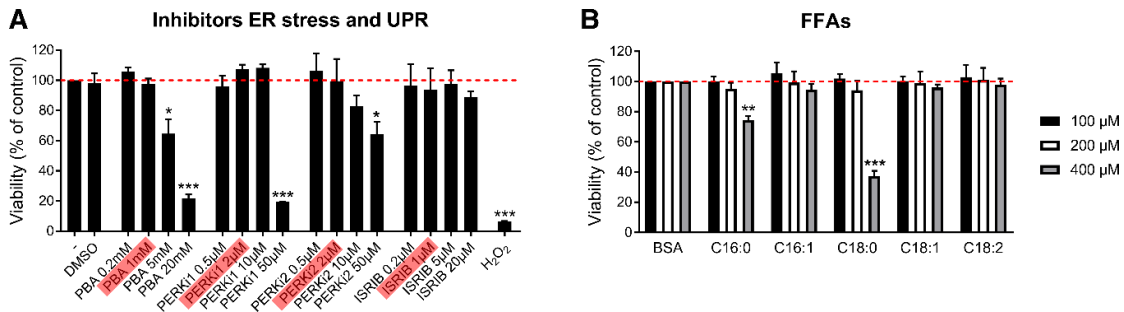

**Figure S1.** Cell toxicity of inhibitors and FFAs. (A–B) Cell viability was assessed with WST1 reagent in PMA-differentiated THP-1 cells treated for 16 hrs with inhibitors or FFAs at the indicated concentration ( $n = 3$ ). \* $p < 0.05$ , \*\* $p < 0.01$ , \*\*\* $p < 0.001$  by one-way ANOVA with Dunnett's multiple comparisons test for (A) and by two-way ANOVA with Sidak's multiple comparisons test for (B). Results are presented as mean  $\pm$  SEM.

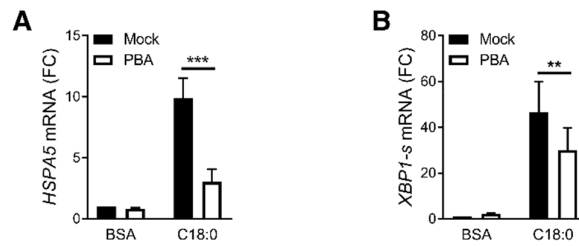

**Figure S2.** PBA reduces ER stress in MDMs. (A–B) mRNA expression measured by RT-qPCR after stimulation of MDMs with 100  $\mu$ M C18:0 for 16 hrs in presence of 1 mM PBA ( $n = 5$ ). \*\* $p < 0.01$ ; \*\*\* $p < 0.001$  by two-way ANOVA with Sidak's multiple comparisons test. Results are presented as mean  $\pm$  SEM. FC, Fold change.

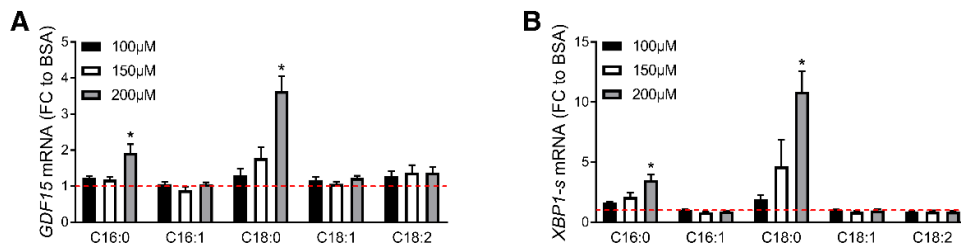

**Figure S3.** SFAs induce *GDF15* expression and ER stress in PMA-differentiated THP1 cells. (A–B) mRNA expression measured by RT-qPCR after treatment with the indicated concentration of FFAs for 16 hrs in PMA-differentiated THP-1 cells ( $n = 5$ ). \* $p < 0.05$  by two-way ANOVA with Sidak's multiple comparisons test. Results are presented as mean  $\pm$  SEM. FC, Fold change.

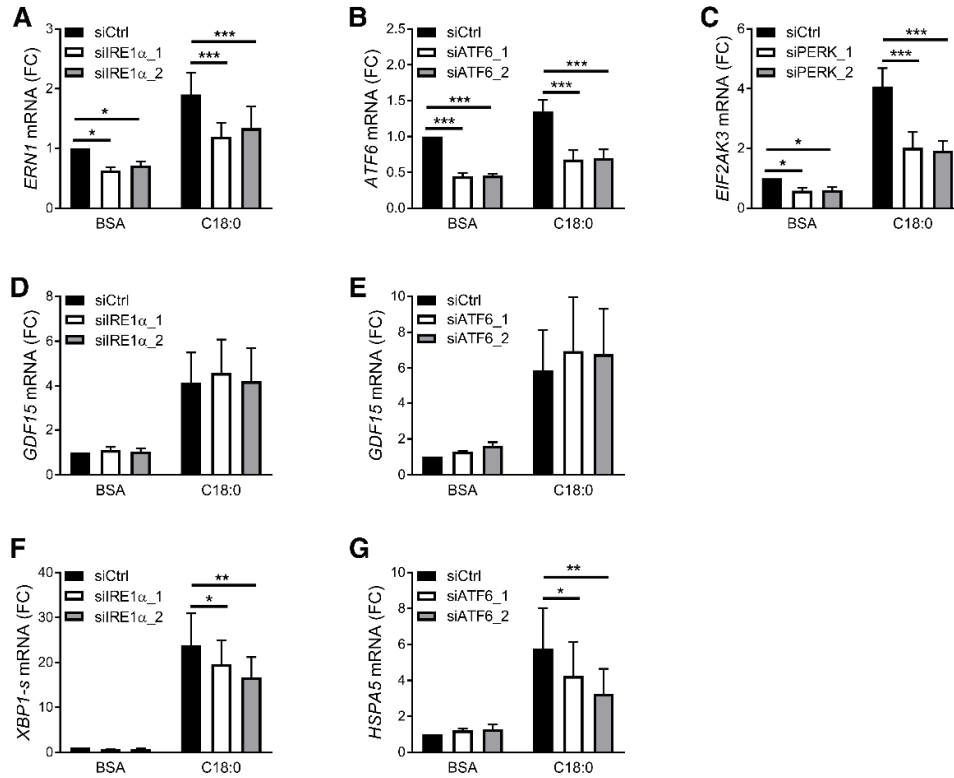

**Figure S4.** IRE1α, ATF6 and PERK silencing in PMA-differentiated THP1 cells. (A–G) mRNA expression measured by RT-qPCR after treatment with 200 μM C18:0 for 16 hrs in PMA-differentiated THP-1 cells after IRE1α, ATF6 or PERK silencing by siRNA (*n* = 5). \**p* < 0.05, \*\**p* < 0.01, \*\*\**p* < 0.001 by two-way ANOVA with Sidak's multiple comparisons test. Results are presented as mean ± SEM. FC, Fold change.

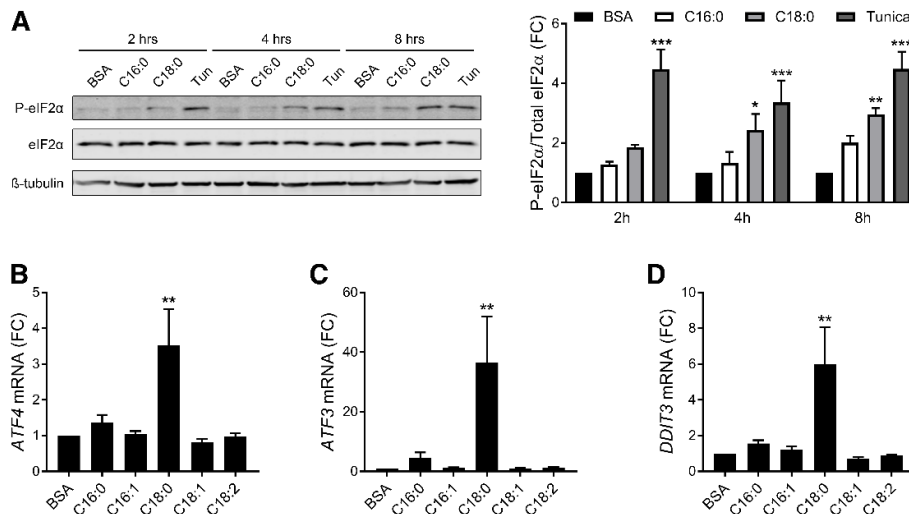

**Figure S5.** SFAs induce ISR in macrophages. (A) Analysis of eIF2α phosphorylation by western blot and quantification after stimulation of PMA-differentiated THP-1 cells with 200 μM SFAs or 5 μg/mL tunicamycin for 2, 4 or 8 hrs (*n* = 5). (B–D) mRNA expression measured by RT-qPCR after treatment with 100 μM FFAs in MDMs (*n* = 5). \**p* < 0.05, \*\**p* < 0.01, \*\*\**p* < 0.001 by two-way ANOVA with Sidak's multiple comparisons test for (A) and by one-way ANOVA with Dunnett's multiple comparisons test for (B–D). Results are presented as mean ± SEM. FC, Fold change.

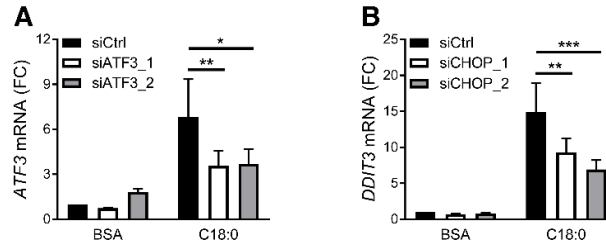

**Figure S6.** ATF3 and CHOP silencing in PMA-differentiated THP1 cells. (A-B) mRNA expression measured by RT-qPCR after treatment with 200  $\mu$ M C18:0 for 16 hrs in PMA-differentiated THP-1 cells after ATF3 or CHOP silencing by siRNA ( $n = 4$ ). \* $p < 0.05$ , \*\* $p < 0.01$ , \*\*\* $p < 0.001$  by two-way ANOVA with Sidak's multiple comparisons test. Results are presented as mean  $\pm$  SEM. FC, Fold change.

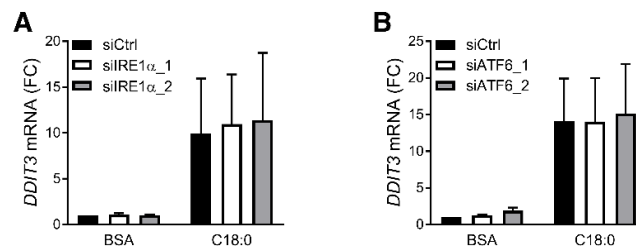

**Figure S7.** IRE1 $\alpha$  and ATF6 silencing on *DDIT3* expression in PMA-differentiated THP1 cells. (A-B) *DDIT3* expression measured by RT-qPCR after treatment with 200  $\mu$ M C18:0 for 16 hrs in PMA-differentiated THP-1 cells after IRE1 $\alpha$  or ATF6 silencing by siRNA ( $n = 5$ ). No statistical differences by two-way ANOVA with Sidak's multiple comparisons test. Results are presented as mean  $\pm$  SEM. FC, Fold change.

**Table S1.** Sequences of siRNA.

| Target gene | siRNA              | Sense                      | Antisense                  |
|-------------|--------------------|----------------------------|----------------------------|
| ERN1        | siIRE1 $\alpha$ _1 | GGACAGGCUCAAUCAAAUGGACUUU  | AAAGUCCAUUUGAUUGAGCCUGUCC  |
| ERN1        | siIRE1 $\alpha$ _2 | CCGAAGUUCAGAUGGAAUCCUCUAC  | GUAGAGGAUUCCAUCUGAACUUCGG  |
| ATF6        | siATF6_1           | CCAAUUUUCAGUUUACAACCUUGCAC | GUGCAGGUUGUAAACUGAUAAUUGG  |
| ATF6        | siATF6_2           | AGAAUUAUAGCUAGGGUUAGAGGCG  | CGCCUCAACCCUAGCAUUAUUAUCU  |
| EIF2AK3     | siPERK_1           | GGUAAUGCGAGAAGUUAAAGCCUUA  | UAAGGCUUUAAACUUCUCGCAUUACC |
| EIF2AK3     | siPERK_2           | GCAGUAUCCAUAUGAUAAUGGUUAU  | AUAACCAUUAUCAUAUGGAUACUGC  |
| DDIT3       | siCHOP_1           | AAGUGACUUUCUAUGAGCCAAAAAA  | UUUUUUGGCUCAUAGAAAGUCACUU  |
| DDIT3       | siCHOP_2           | GAACCAGCAGAGGUCACAAGCACCU  | AGGUGCUUGUGACCUCUGCUGGUUC  |
| ATF3        | siATF3_1           | GCAUUUGAUUAUCAUGCUCAACCUU  | AAGGUUGAGCAUGUAUCAAUUGC    |
| ATF3        | siATF3_2           | CGACCAGAAAGAAAUAAGAUUGCAG  | CUGCAAUCUUUAUUUCUUUCUGUCG  |

**Table S2.** List of primers used in RT-qPCR.

| Gene           | Accession numbers                                                                                   | Forward                  | Tm    | Reverse               | Tm    |
|----------------|-----------------------------------------------------------------------------------------------------|--------------------------|-------|-----------------------|-------|
| <b>GDF15</b>   | NM_004864                                                                                           | GCAAGAACTCAGGACGGTGA     | 59.97 | TGGAGTCTTCGGAGTGCAAC  | 59.97 |
| <b>OAZ1</b>    | NM_004152 ; NM_001301020<br>NM_000389 ; NM_078467 ; NM_001291549 ;<br>NM_001220778 ; NM_001220777 ; | GGATCCTCAATAGCCACTGC     | 58.11 | TACAGCAGTGGAGGGAGACC  | 60.61 |
| <b>CDKN1A</b>  | NM_001374509 ; NM_001374510 ;<br>NM_001374511 ; NM_001374512 ;<br>NM_001374513                      | GCGAGGCACAAGGGTACAAGACAG | 65.67 | TAATGGCGGGCTGCATCCAG  | 62.96 |
| <b>MDM2</b>    | NM_002392 ; NM_001145339 ;<br>NM_001145337 ; NM_001145340 ;<br>NM_001278462 ; NM_001367990          | GCCCTTCGTGAGAATTGGCT     | 60.68 | AAAGCCCTCTTCAGCTTGTGT | 60.13 |
| <b>HSPA5</b>   | NM_005347                                                                                           | TAGCGTATGGTGCTGCTGTC     | 60.18 | TTTGTCAAGGGTCTTTTACC  | 57.64 |
| <b>XBP1-s</b>  | NM_001079539                                                                                        | CTGAGTCCGCAGCAGGTG       | 60.43 | ACTGGGTCCAAGTTGTCCAG  | 59.53 |
| <b>ERN1</b>    | NM_001433                                                                                           | AGCAGTTAGAGAGAGGCGGG     | 61.04 | CTGGAGGGGACAGTGATGT   | 60.91 |
| <b>ATF6</b>    | NM_007348                                                                                           | CAATTGGAAGCAGCAAATGA     | 55.12 | ACCGAGGAGACGAGACTGAA  | 59.96 |
| <b>EIF2AK3</b> | NM_004836 ; NM_001313915                                                                            | GTGGGACCAAGACCGTGAAA     | 60.18 | CGACAACCCAGAGCTGAACA  | 60.25 |
| <b>ATF4</b>    | NM_001675 ; NM_182810                                                                               | TCAAACCTCATGGGTTCTCC     | 57.12 | GTGTCATCCAACGTGGTCAG  | 58.85 |

|              |                                                                                            |                       |       |                      |       |
|--------------|--------------------------------------------------------------------------------------------|-----------------------|-------|----------------------|-------|
| <b>DDIT3</b> | NM_001195053 ; NM_001195054 ;<br>NM_001195055 ; NM_001195056 ;<br>NM_004083 ; NM_001195057 | GAACCAGGAAACGGAAACAGA | 58.43 | TCTCCTTCATGCGCTGCTT  | 59.70 |
| <b>ATF3</b>  | NM_001674 ; NM_001030287 ;<br>NM_001040619 ; NM_001206484 ;<br>NM_001206486 ; NM_001206488 | ATTGTCCGGGCTCAGAATGG  | 60.11 | ACCACGACTGCTTAGCTCTG | 59.76 |

Table S3. List of primers used in CHIP-qPCR.

| Site             | Forward                   | Tm    | Reverse                     | Tm    |
|------------------|---------------------------|-------|-----------------------------|-------|
| Promoter site A  | GCTGGAGCTTGCAGGTTGG       | 61.63 | AAAATTTTCAGAAATTAACCGGTCGTG | 59.36 |
| Promoter site B  | ACCACGACCGGTTAATTTCTGAA   | 60.49 | AAAAATTAATAACTCTAGCCCCTGGC  | 60.05 |
| Promoter site C  | TGCTCTTGTTGATCAGGCGGA     | 62.05 | CTGGGCTTGGTGGTGGGATTA       | 62.09 |
| Promoter site D  | AGAATGAGTAGGAGTTCTCCAGAGG | 60.87 | CATAGGAGGCACTTGATAAACTGGG   | 61.21 |
| Promoter site NS | ATTATGAATCCTGTGAGGATGGCTT | 60.16 | ATTATCTTTCCAGTCTAAGCAGGGT   | 59.57 |
